# Supplementary material for: Identification of Laccase Genes in Grapevine and Their Roles in Response to Botrytis cinerea
Source: MDPI journal article supplement (doi:10.3390/horticulturae10040376), 2024-04-09
Supplement: s1 [file s1]

Table S1 Primers of the selected *VaLAC* genes used for qRT-PCR

| Gene Name        | Primer sequences       |
|------------------|------------------------|
| <i>VvLAC4-F</i>  | GGTGGCTTCTCTGTTTCCGA   |
| <i>VvLAC4-R</i>  | AGCATGAATGGTAGGCCAG    |
| <i>VvLAC7-F</i>  | AACACGGATCCTGCCAACTT   |
| <i>VvLAC7-R</i>  | CATTGCAAGCCATTGTTGTTGT |
| <i>VvLAC8-F</i>  | CCGGCCAGACATACACCTAC   |
| <i>VvLAC8-R</i>  | GGGGCTTTGGGAATGGGTAA   |
| <i>VvLAC13-F</i> | CATATGCAACAGGGCAAGGC   |
| <i>VvLAC13-R</i> | TAAAAGGAGGCAATGCCGGT   |
| <i>VvLAC14-F</i> | CCTCACTGCCGATCAGTCTC   |
| <i>VvLAC14-R</i> | TTCAGGGGTTGATGACGTGG   |
| <i>VvLAC15-F</i> | CAAGTCGAGGCCGAAAAAC    |
| <i>VvLAC15-R</i> | CATTTGTGGTTTGCCAGGG    |
| <i>VvLAC17-F</i> | GGTCAAACCACTGACGTCCT   |
| <i>VvLAC17-R</i> | GCAGGACAAGGAGCAGACTT   |
| <i>VvLAC19-F</i> | CGAAGCTTGGCAAACAGTCA   |
| <i>VvLAC19-R</i> | TGGTACTGTTGTTGGGACCT   |
| <i>VvLAC23-F</i> | CTATGCAGTTGGGAGGGGAC   |
| <i>VvLAC23-R</i> | CTGGGTTGTCTGCCCTGAAT   |
| <i>VvLAC24-F</i> | AACCGGAAACTATGACCCCC   |
| <i>VvLAC24-R</i> | CATGAACCAAACGCCTGGG    |
| <i>VvLAC25-F</i> | ATCAATGCAGCACTCAACGC   |
| <i>VvLAC25-R</i> | AACTTGATCCGCTGTGAGCA   |
| <i>VvLAC30-F</i> | GCGAAGAAATGTTGGGGTCG   |
| <i>VvLAC30-R</i> | CATCATGCTCTTCGTGCTGC   |
